# Supplementary material
Source: bioRxiv or medRxiv preprint supplement (https://medrxiv.org/highwire/filestream/82366/field_highwire_adjunct_files/7/2020.05.21.20108936-8.pdf)

# Local Authority All Deaths (except COVID-19) per 100,000 At Home

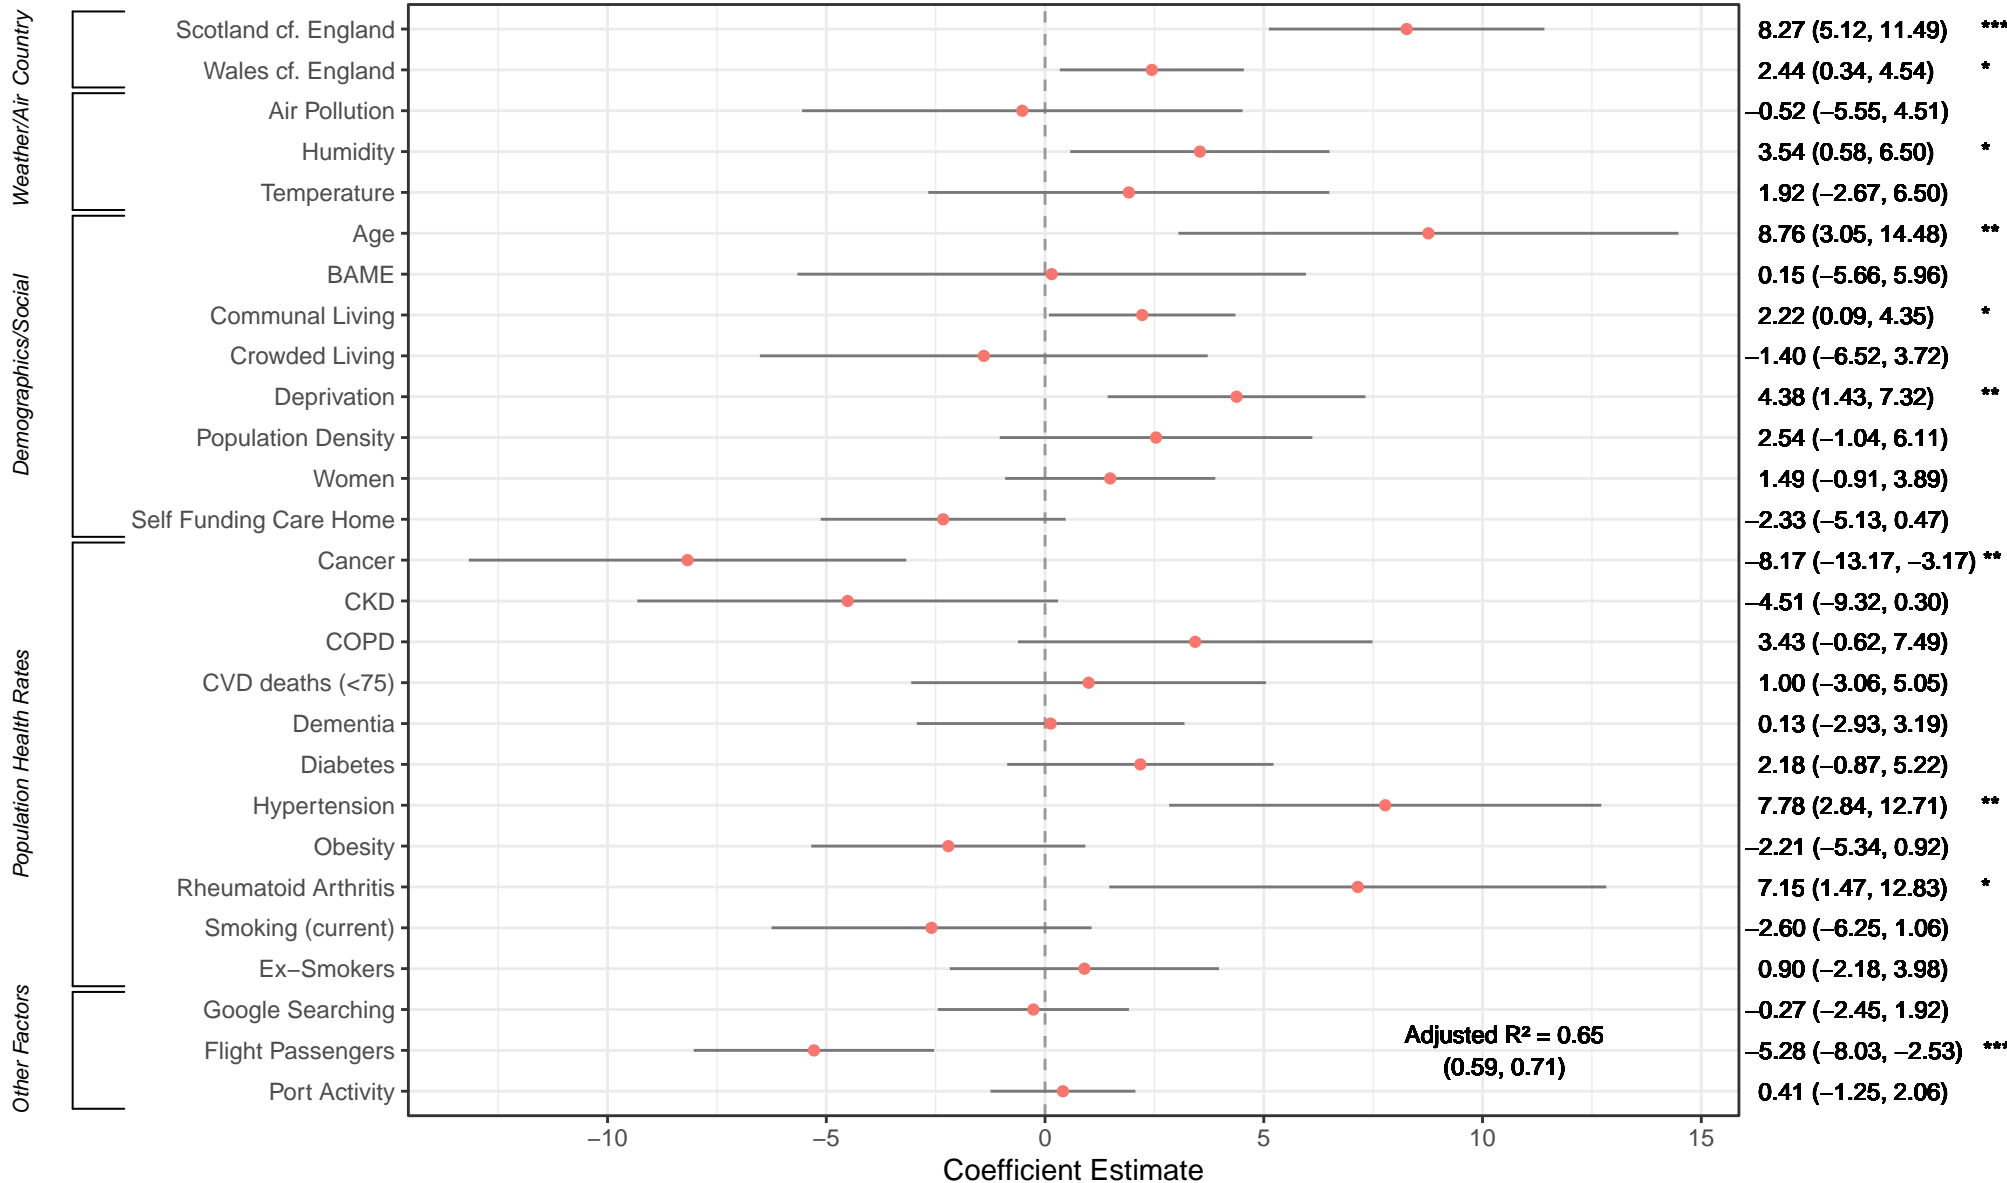

Supplement: Supplementary file [file 2020.05.21.20108936-8.pdf]
